# Supplementary material for: Overarching control of autophagy and DNA damage response by CHD6 revealed by modeling a rare human pathology
Source: PubMed Central journal article supplement (PMC8140133; doi:10.1038/s41467-021-23327-1), 2021-05-21
Supplement: 41467_2021_23327_MOESM1_ESM.pdf [file 41467_2021_23327_MOESM1_ESM.pdf]

## SUPPLEMENTARY INFORMATION

# Overarching control of autophagy and DNA damage response by CHD6 revealed by modeling a rare human pathology

Yulia Kargapolova<sup>1,#,\*</sup>, Rizwan Rehimi<sup>1,2</sup>, Hülya Kayserili<sup>3</sup>, Joanna Brühl<sup>4</sup>, Konstantinos Sofiadis<sup>5</sup>, Anne Zirkel<sup>1</sup>, Spiros Palikyras<sup>5</sup>, Athanasia Mizi<sup>5</sup>, Yun Li<sup>6</sup>, Gökhan Yigit<sup>6</sup>, Alexander Hoischen<sup>7</sup>, Stefan Frank<sup>1,8,#</sup>, Nicole Russ<sup>1,8</sup>, Jonathan Trautwein<sup>4</sup>, Bregje van Bon<sup>7</sup>, Christian Gilissen<sup>7</sup>, Magdalena Laugsch<sup>1,#</sup>, Eduardo Gade Gusmao<sup>5</sup>, Natasa Josipovic<sup>5</sup>, Janine Altmüller<sup>9</sup>, Peter Nürnberg<sup>9</sup>, Gernot Längst<sup>10</sup>, Frank J. Kaiser<sup>11</sup>, Erwan Watrin<sup>12</sup>, Han Brunner<sup>7</sup>, Alvaro Rada-Iglesias<sup>1,2,13</sup>, Leo Kurian<sup>1,8</sup>, Bernd Wollnik<sup>6,14</sup>, Karim Bouazoune<sup>4,\*</sup> & Argyris Papantonis<sup>1,5,\*</sup>

<sup>1</sup> Center for Molecular Medicine Cologne (CMMC), University of Cologne, 50931 Cologne, Germany

<sup>2</sup> Cluster of Excellence Cellular Stress Responses in Age-associated Disorders (CECAD), University of Cologne, 50931 Cologne, Germany

<sup>3</sup> Medical Genetics Department, Koç University School of Medicine, Istanbul 34010, Turkey

<sup>4</sup> Institute for Molecular Biology und Tumour Research (IMT), Philipps-University Marburg, 35043 Marburg, Germany

<sup>5</sup> Institute of Pathology, University Medical Center Göttingen, 37075 Göttingen, Germany

<sup>6</sup> Institute of Human Genetics, University Medical Center Göttingen, 37075 Göttingen, Germany

<sup>7</sup> Department of Human Genetics, Radboud University Medical Center, 6525 GA Nijmegen, The Netherlands

<sup>8</sup> Institute of Neurophysiology, University of Cologne, 50931 Cologne, Germany

<sup>9</sup> Cologne Center for Genomics, University of Cologne, 50931 Cologne, Germany

<sup>10</sup> Biochemistry Centre Regensburg (BRC), University of Regensburg, 93053 Regensburg, Germany

<sup>11</sup> Institute of Human Genetics, University Hospital Essen, 45147 Essen, Germany

<sup>12</sup> Research Institute of Genetics and Development, Faculté de Médecine, 35043 Rennes, France

<sup>13</sup> Institute of Biomedicine and Biotechnology of Cantabria (IBBTEC), University of Cantabria, 39011 Santander, Spain

<sup>14</sup> Cluster of Excellence Multiscale Bioimaging: from Molecular Machines to Networks of Excitable Cells (MBExC), University of Göttingen, 37075 Göttingen, Germany

# Present address: Y.K., Heart Center, University Hospital Cologne, 50937 Cologne, Germany; S.F., Bayer AG, 42096 Wuppertal, Germany; M.L., Institute of Human Genetics, University of Heidelberg, 69120 Heidelberg, Germany

\*Correspondence to: AP: [argyris.papantonis@med.uni-goettingen.de](mailto:argyris.papantonis@med.uni-goettingen.de); YK: [ykargapo@uni-koeln.de](mailto:ykargapo@uni-koeln.de); KB: [bouazoune@imt.uni-marburg.de](mailto:bouazoune@imt.uni-marburg.de)

## Contents

—This online supplement contains **Supplementary Figures 1-6** and **Supplementary Table 1**.

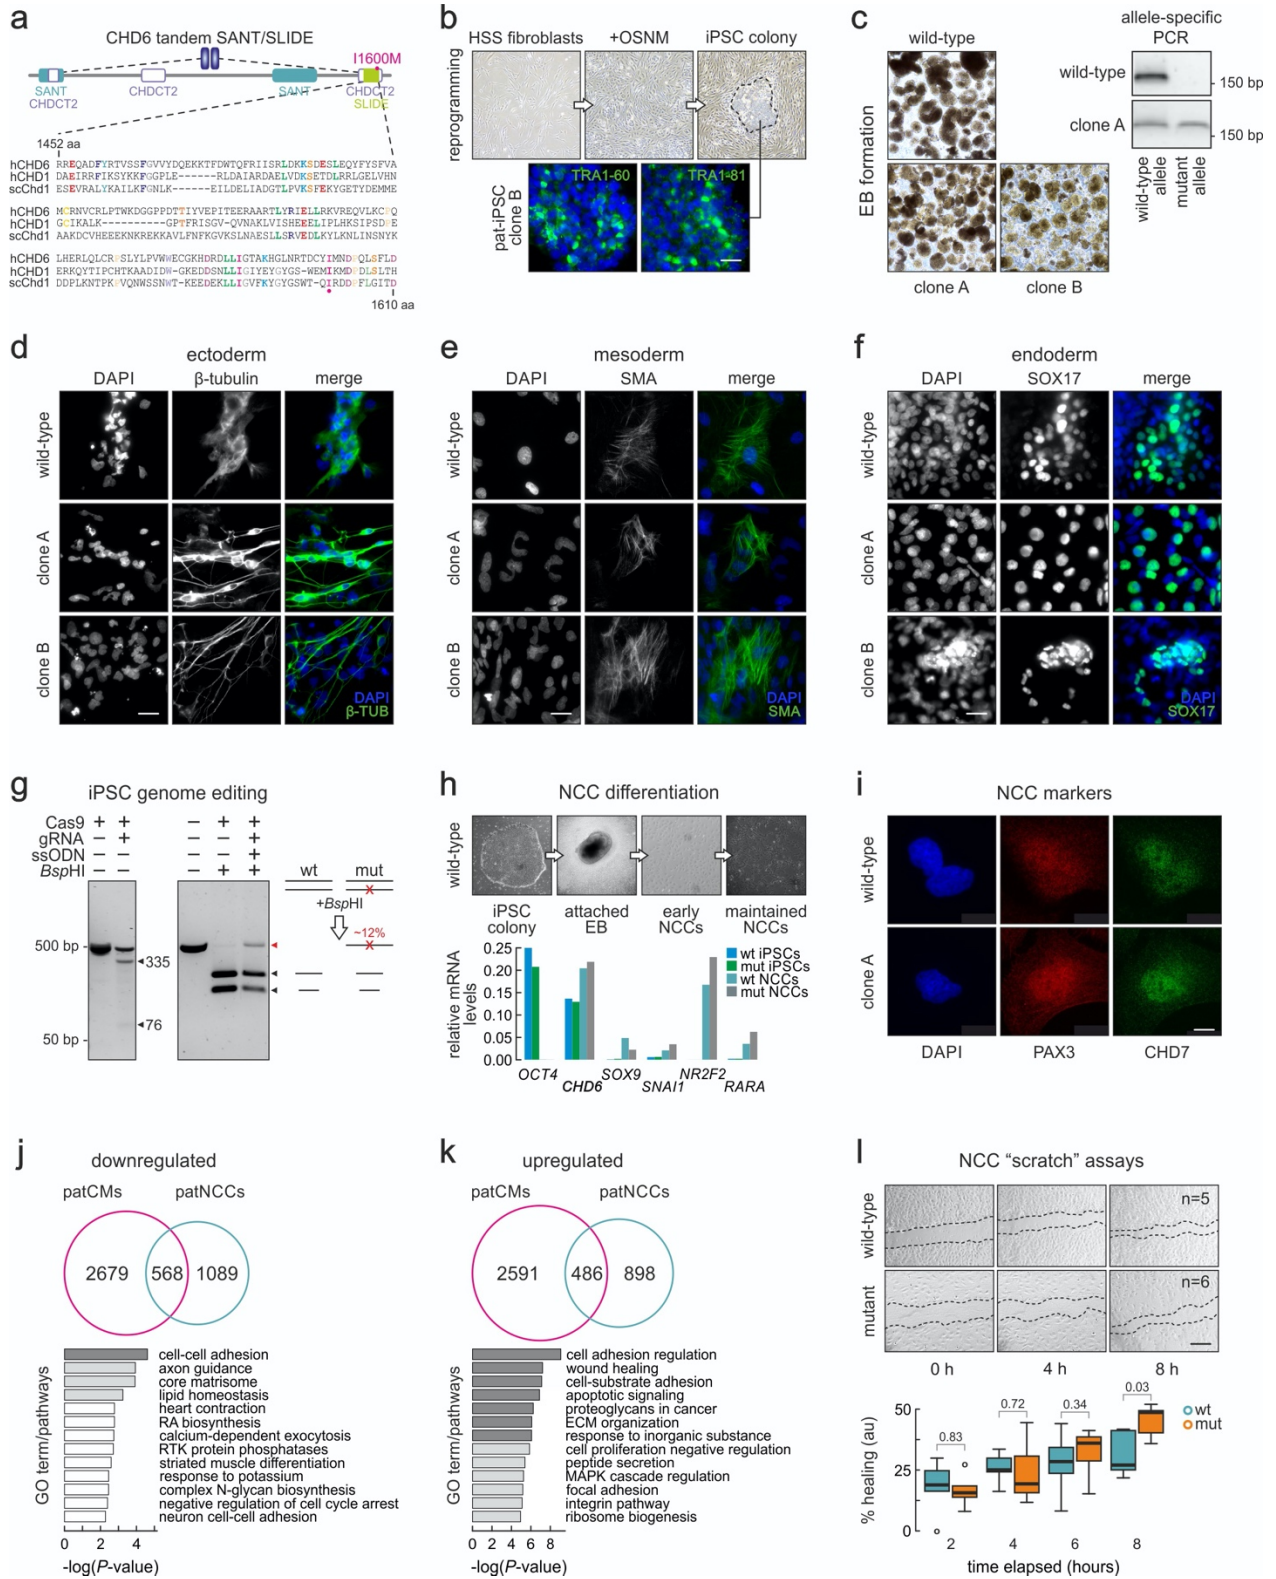

**Supplementary Fig. 1 Characterization of reprogrammed and genome-edited iPSC lines.** **a**, SANT-related subdomains identified in CHD6 using the NCBI CDD with E-value=100 (*top*). The conservation of the I1600 CHD6 residue across CHD-family proteins is shown by alignment of the human (h) CHD6 and CHD1 with the *S. cerevisiae* (sc) Chd1 protein sequences (*below*). **b**, Representative brightfield images of patient-derived fibroblasts (*top left*) undergoing reprogramming via *OCT4*, *SOX2*, *NANOG*, and *MYC* overexpression (*top middle*), before single iPSC colonies are picked from the plate (dashed line; *top right*). Representative immunofluorescence images of patient-derived iPSC clones stained for the TRA1-60 (*bottom left*) and TRA1-81 markers (*bottom right*) in nuclei are counterstained with DAPI. Bar, 10  $\mu\text{m}$ . **c**, Representative brightfield images of wild-type (*top*) and patient-derived iPSCs (*bottom*) giving rise to embryonic bodies (EBs). *Inset* (*top right*): allele-specific PCR confirmed expression of the mutant *CHD6* allele only in patient-derived cells. **d**, Representative immunofluorescence images of wild-type and two patient-derived iPSC clones (*middle* and *bottom rows*) differentiated into ectoderm and stained for  $\beta$ -tubulin. Bar, 10  $\mu\text{m}$ . **e**, As in panel (d), but differentiated into mesoderm and stained for SMA. Bar, 10  $\mu\text{m}$ . **f**, As in panel (d), but differentiated into endoderm and stained for SOX17. Bar, 10  $\mu\text{m}$ . **g**, Agarose gel electrophoresis profiles of iPSC genomic DNA cut by Cas9 at the *CHD6* locus (*left*) and of wild-type and edited iPSCs diagnosed for carrying the HSS mutation via *Bsp*HI restriction digest. **h**, Representative brightfield images of iPSCs differentiated into NCCs (*top*) and RT-qPCR mean levels of lineage markers and *CHD6* ( $n=2$  independent experiments; *bottom*). **i**, Representative immunofluorescence images of wild-type and mutant iPSC-derived NCCs stained for PAX6 (*left*) and CHD7 (*right*). Nuclei were counterstained with DAPI. Bar, 10  $\mu\text{m}$ . **j**, Bar plot showing significantly enriched GO terms/pathways associated with downregulated genes (at least 0.6  $\log_2$ -fold change,  $P_{\text{adj}} < 0.05$ ) shared by patient-derived CMs and NCCs. **k**, As in panel (j), but for upregulated genes shared by patient-derived CMs and NCCs. **l**, *In vitro* migration (“scratch”) assays of wild-type (*top row*) and mutant NCCs (*bottom row*) and their quantification (boxplots show medians with whiskers indicating 95% confidence interval; *below*) over 8 h; unpaired two-tailed Student’s t-test  $P$ -values are shown for each time point (the number,  $n$ , of independent assays performed is indicated). Bar, 50  $\mu\text{m}$ .

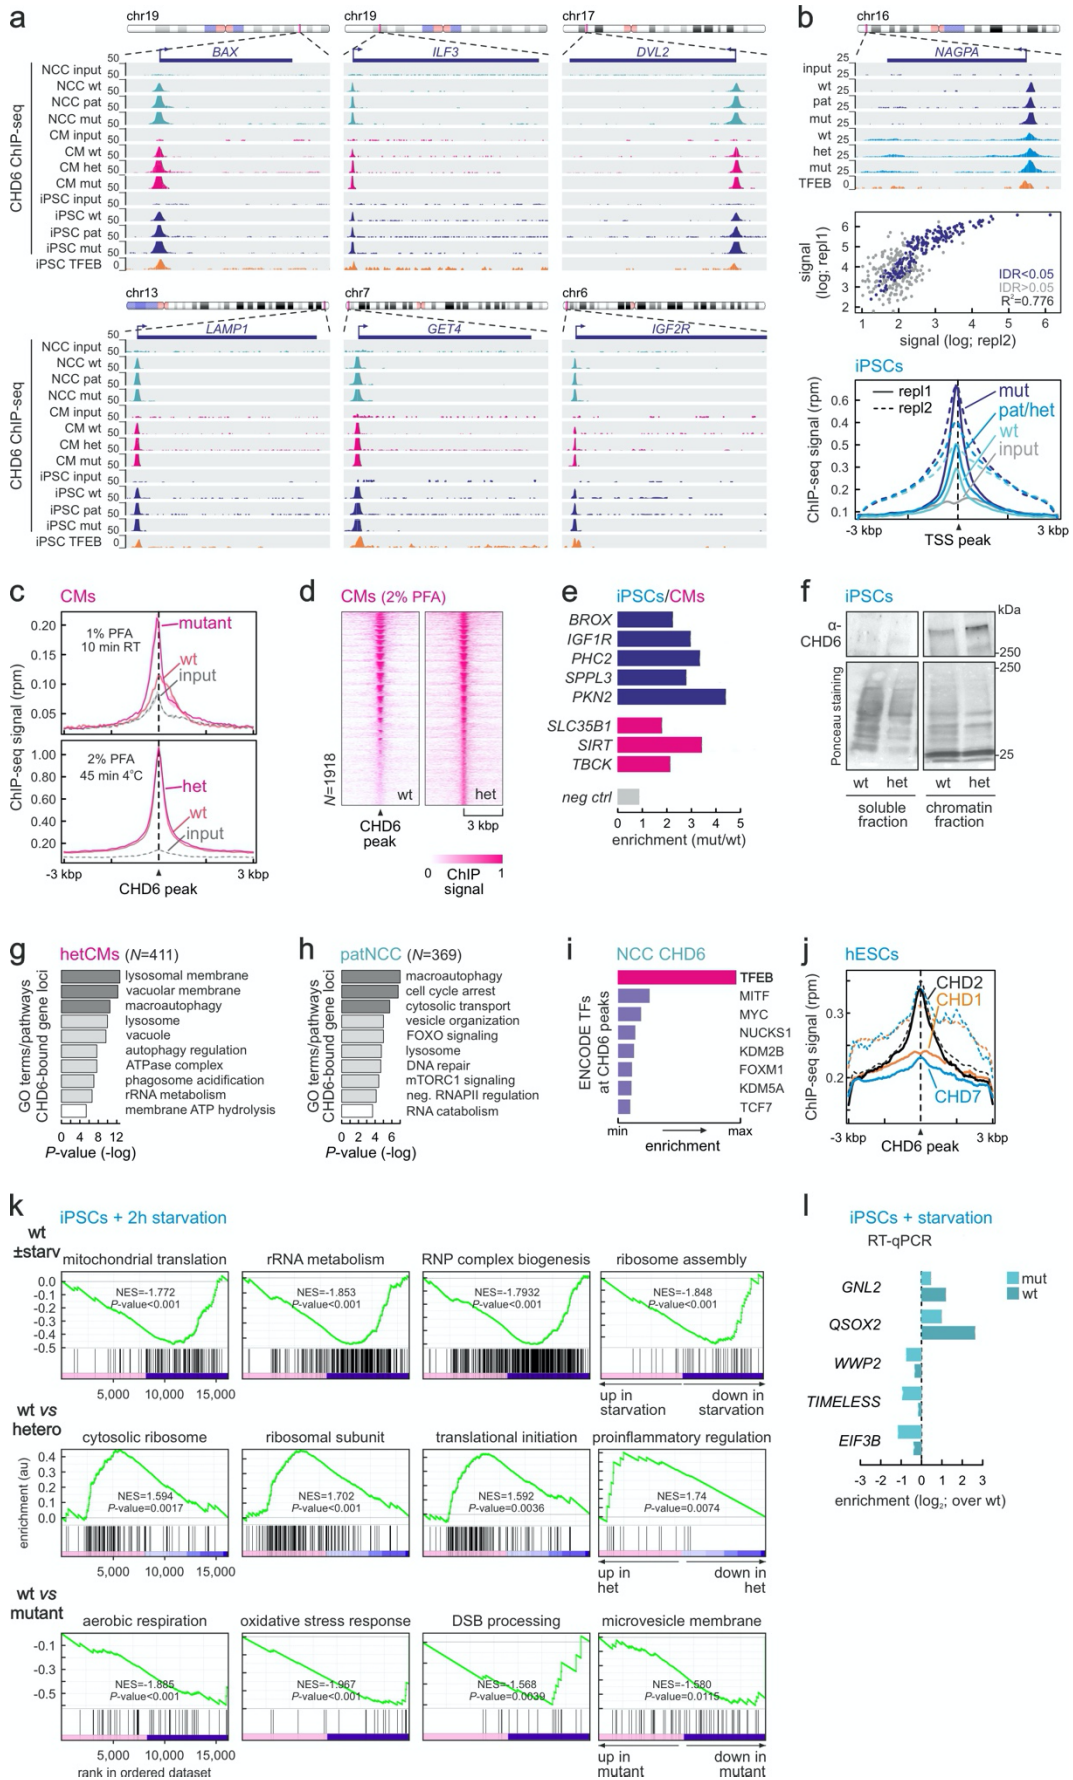

**Supplementary Fig. 2 CHD6 ChIP-seq data analysis across the different cell types.** **a**, Representative genome browser views of CHD6 ChIP-seq in wild-type (wt), heterozygous/ monoallelic mutant (het/mut) or patient-derived (pat) NCCs (*green*), CMs (*magenta*), and iPSCs (*blue*) aligned to iPSC TFEB ChIP-seq (*orange*). **b**, Representative genome browser views (*top*) of CHD6 ChIP-seq from two iPSC replicates (*dark/light blue*) in all genotypes aligned to TFEB ChIP-seq (*orange*). The scatter plot (*middle*) shows reproducibility of the two mutCHD6 replicates on the basis of IDR values; Spearman's correlation coefficient ( $R^2$ ) is also shown. The line plots (*bottom*) show mean ChIP-seq signal from wild-type (*light blue*) heterozygous/patient-derived (*blue*) and monoallelic-mutant iPSC replicates (*dark blue*) in the 6 kbp around 1770 CHD6-bound TSSs; input levels provide a control (*grey*). **c**, As in panel (b), but from wild-type (*light pink*) and monoallelic-/heterozygous-mutant CMs (*magenta*). CHD6 ChIP in the top panel was performed using 1% PFA for 10 min at room temperature, whereas in the bottom panel 2% PFA for 45 min at 4°C was used (yielding 271 and 642 wt peaks, respectively). **d**, Heatmaps showing ChIP-seq signal in the 6 kbp around CHD6-bound sites from wild-type (wt) or heterozygous mutant CMs (het) for all 1918 peaks detected. **e**, Bar plots showing ChIP-qPCR enrichment (mean, n=2 independent experiments) of mutant over wild-type CHD6 in iPSCs (*blue*) and CMs (*magenta*). **f**, Chromatin fractionation western blot showing CHD6 from equal numbers of wild-type and heterozygous mutant iPSCs localizing to chromatin. Ponceau stainings provide a loading control. **g**, Bar plots showing significantly-enriched GO terms/pathways for CHD6-bound genes in heterozygous mutant CMs. The number of genes analyzed (*N*) is given. **h**, As in panel (f), but for CHD6-bound genes in patient-derived NCCs. **i**, Bar plots showing signal enrichment for ENCODE transcription factor ChIP-seq data at CHD6-bound sites from mutant NCCs. **j**, Line plot showing CHD1 (*orange*), CHD2 (*black*), and CHD7 ChIP-seq signal (*blue*) in the 6 kbp around CHD6-bound sites from mutant iPSCs; signal distribution over all peaks in the respective dataset (e.g., CHD1 signal over all CHD1 peaks) provides a reference (*dashed lines*). **k**, Gene set enrichment analysis of ranked gene expression data from 3'-end RNA-seq data of serum-starved wild-type compared to serum-starved heterozygous (*middle row*) or monoallelic mutant iPSCs (*bottom row*); same analysis on wild-type iPSCs in the presence or absence of starvation provides a control (*top row*). **l**, Bar plots showing RT-qPCR mean expression changes ( $\log_2$ ) of exemplary genes in heterozygous (het) or monoallelic mutant iPSCs (mut) compared to wild-type (n=2 independent experiments) upon 2h-starvation.

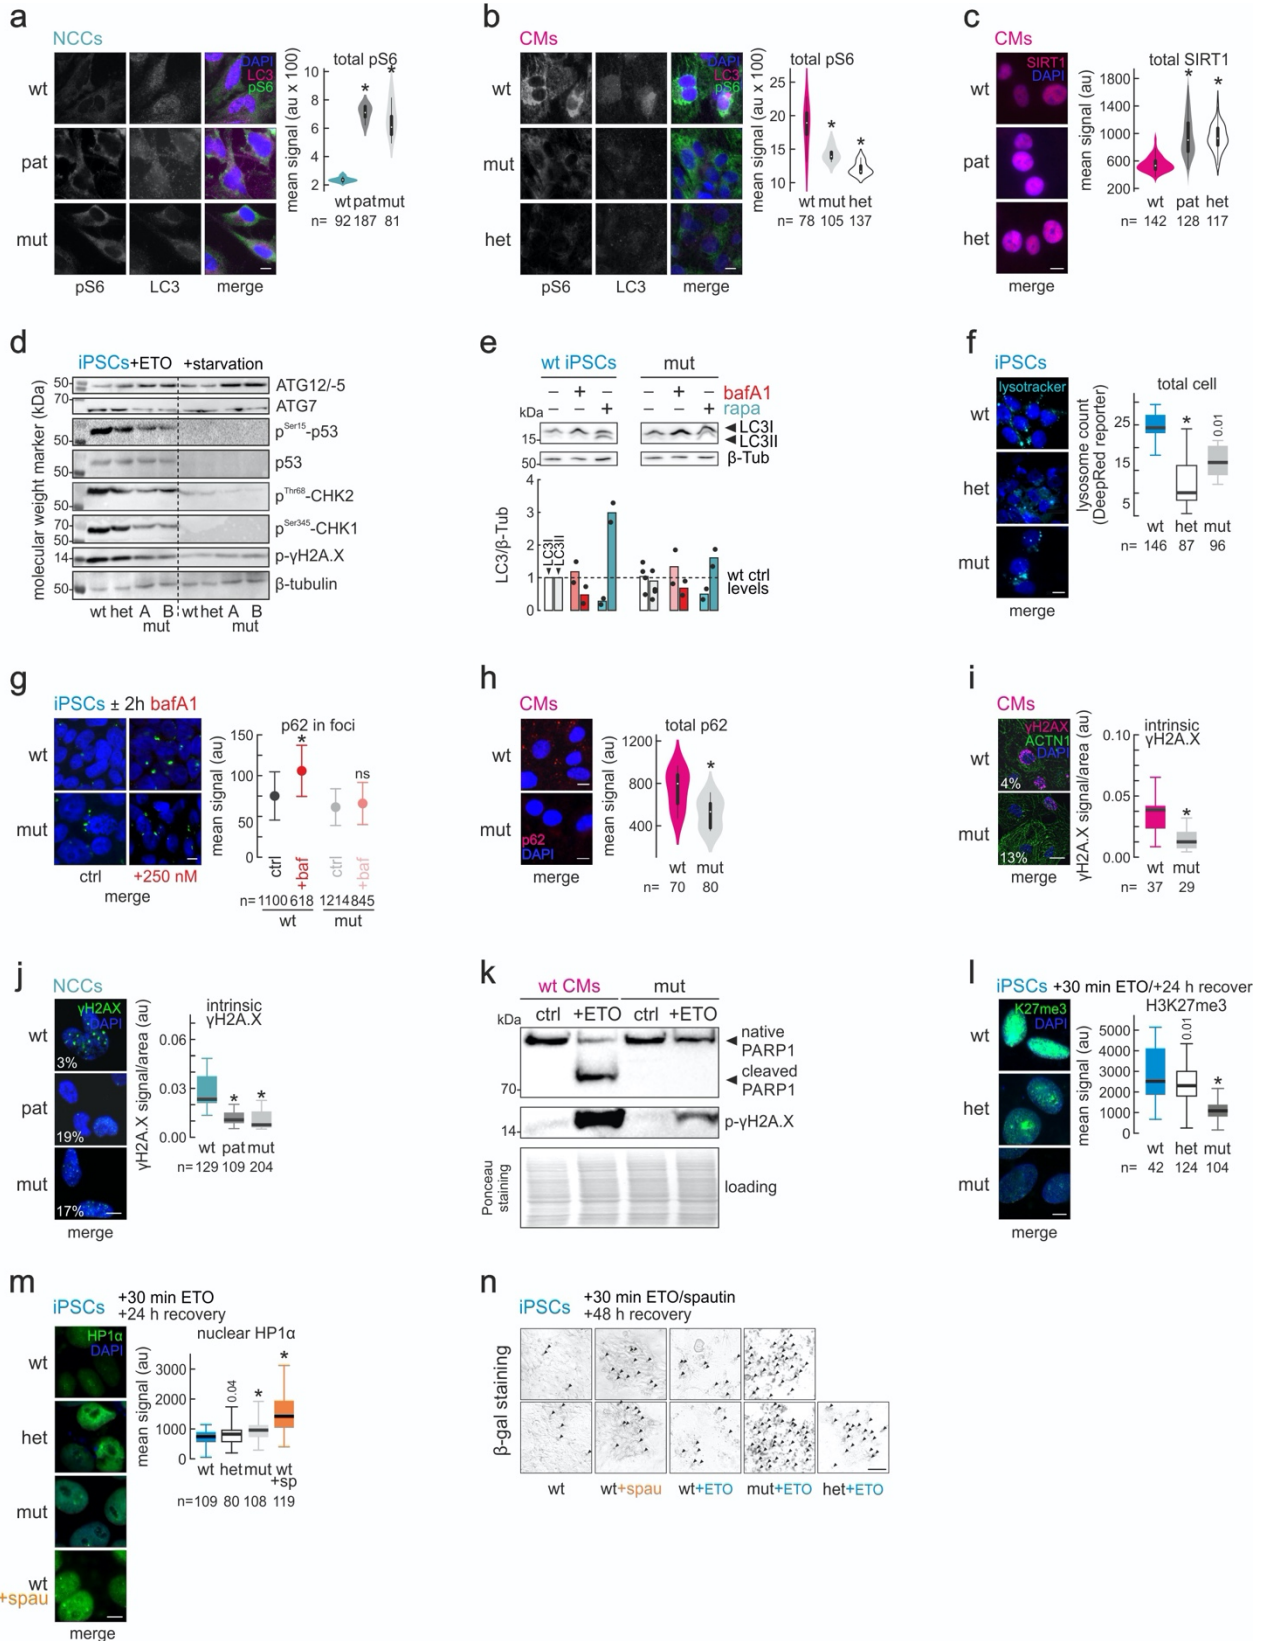

**Supplementary Fig. 3 Autophagy, DNA damage response, and senescence induction in *CHD6*-mutant cells.**

**a**, Representative immunofluorescence images (*left*) of wild-type (wt), patient-derived (pat) or monoallelic mutant NCCs (mut) stained for LC3 and phospho-S6, and counterstained with DAPI from one experiment (but replicated independently). Bean plots (*right*) show median phospho-S6 levels (with thick lines indicating IQR, and thin lines indicating 95% confidence intervals). The number of cells analyzed (n) is indicated below each plot. Bar, 5  $\mu$ M. \*: significantly different from wt;  $P < 0.01$ , Wilcoxon-Mann-Whitney test. **b**, As in panel (a), but for total cell phospho-S6 levels in CMs. Bar, 5  $\mu$ M. **c**, As in panel (a), but for total cell SIRT1 levels in CMs. Bar, 5  $\mu$ M. **d**, Western blot analysis of proteins involved in autophagy and the DNA damage response in wild-type (wt), heterozygous (het) and two monoallelic-mutant iPSC lines (mutA,B) following etoposide treatment (*left*) or starvation (*right*) from at least 2 independent experiments;  $\beta$ -tubulin provides a loading control. **e**, Western blots (*top*) showing LC3I/III changes in wild-type and monoallelic mutant iPSCs treated with rapamycin (rapa) or bafilomycin (bafA1);  $\beta$ -tubulin provides a loading control. Normalized LC3I/II band intensities (mean, n=2 independent experiments) are plotted relative to wt levels (*bottom*). **f**, As in panel (a), but using the *in vivo* LysoTracker DeepRed reporter in iPSCs. Box plots show mean signal with whiskers indicating 95% confidence intervals. Bar, 5  $\mu$ M. **g**, As in panel (f), but staining for p62 in wild-type or monoallelic mutant iPSCs in the presence or absence of bafilomycin A1 (bafA1). Plots show mean signal ( $\pm$ SD) in p62 puncta. \*: significantly different mean to wt;  $P < 0.01$ , unpaired two-tailed Welsch t-test. Bar, 5  $\mu$ M. **h**, As in panel (a), but analyzing total cell p62 signal in CMs. **i**, As in panel (f), but staining for intrinsic  $\gamma$ H2A.X in wild-type (wt) or monoallelic mutant CMs (mut). Bar, 5  $\mu$ M. **j**, As in panel (i), but in wild-type (wt), patient-derived (pat) or monoallelic mutant NCCs (mut). Bar, 5  $\mu$ M. **k**, Western blot of PARP1 and phosphorylated  $\gamma$ H2A.X in wild-type (wt) or monoallelic mutant CMs (mut) with or without 30-min etoposide treatment. The positions of native and cleaved PARP1 are indicated (*arrowheads*); Ponceau staining provides a loading control. **l**, As in panel (f), but staining for H3K27me3 in iPSCs treated for 30 min with etoposide and allowed 48 h to recover. \*: significantly different mean to wt;  $P < 0.01$ , unpaired two-tailed Welsch t-test. Bar, 5  $\mu$ M. **m**, As in panel (l), but staining for HP1 $\alpha$ , including autophagy inhibition using spautin (spau). Bar, 5  $\mu$ M. **n**, Representative  $\beta$ -galactosidase stainings of wild-type (wt), monoallelic (mut) or heterozygous mutant iPSCs (het) treated or not with etoposide and/or spautin and allowed 24 h to recover;  $\beta$ -gal positive cells are indicated (*arrowheads*). Bar, 100  $\mu$ M.

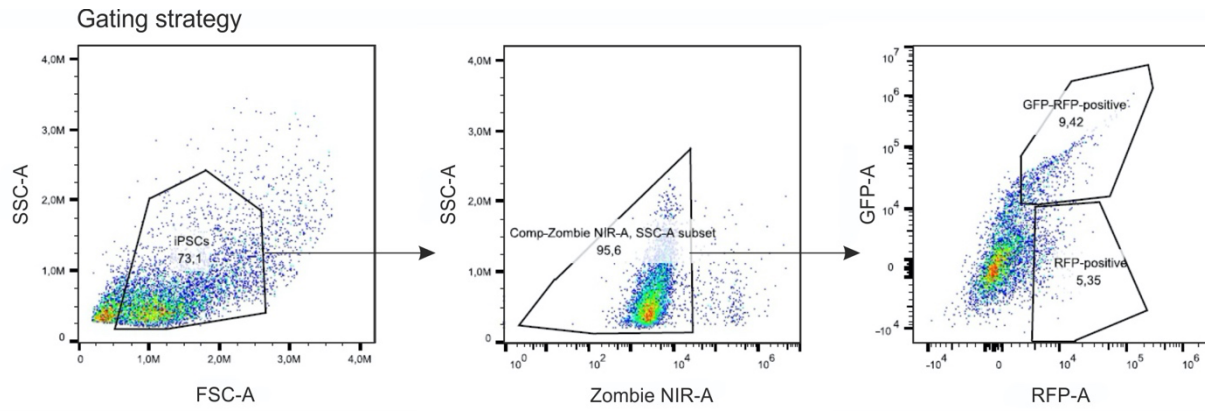

**Supplementary Fig. 4 Gating strategy for assessing autophagy flux using cell sorting.** Three consecutive steps for gating on the basis of light scattering (*left*), viability (*middle*), and GFP/RFP fluorescence levels (*right*). The numbers in each gate (*polygons*) indicate the percent of cells passing the threshold defined.



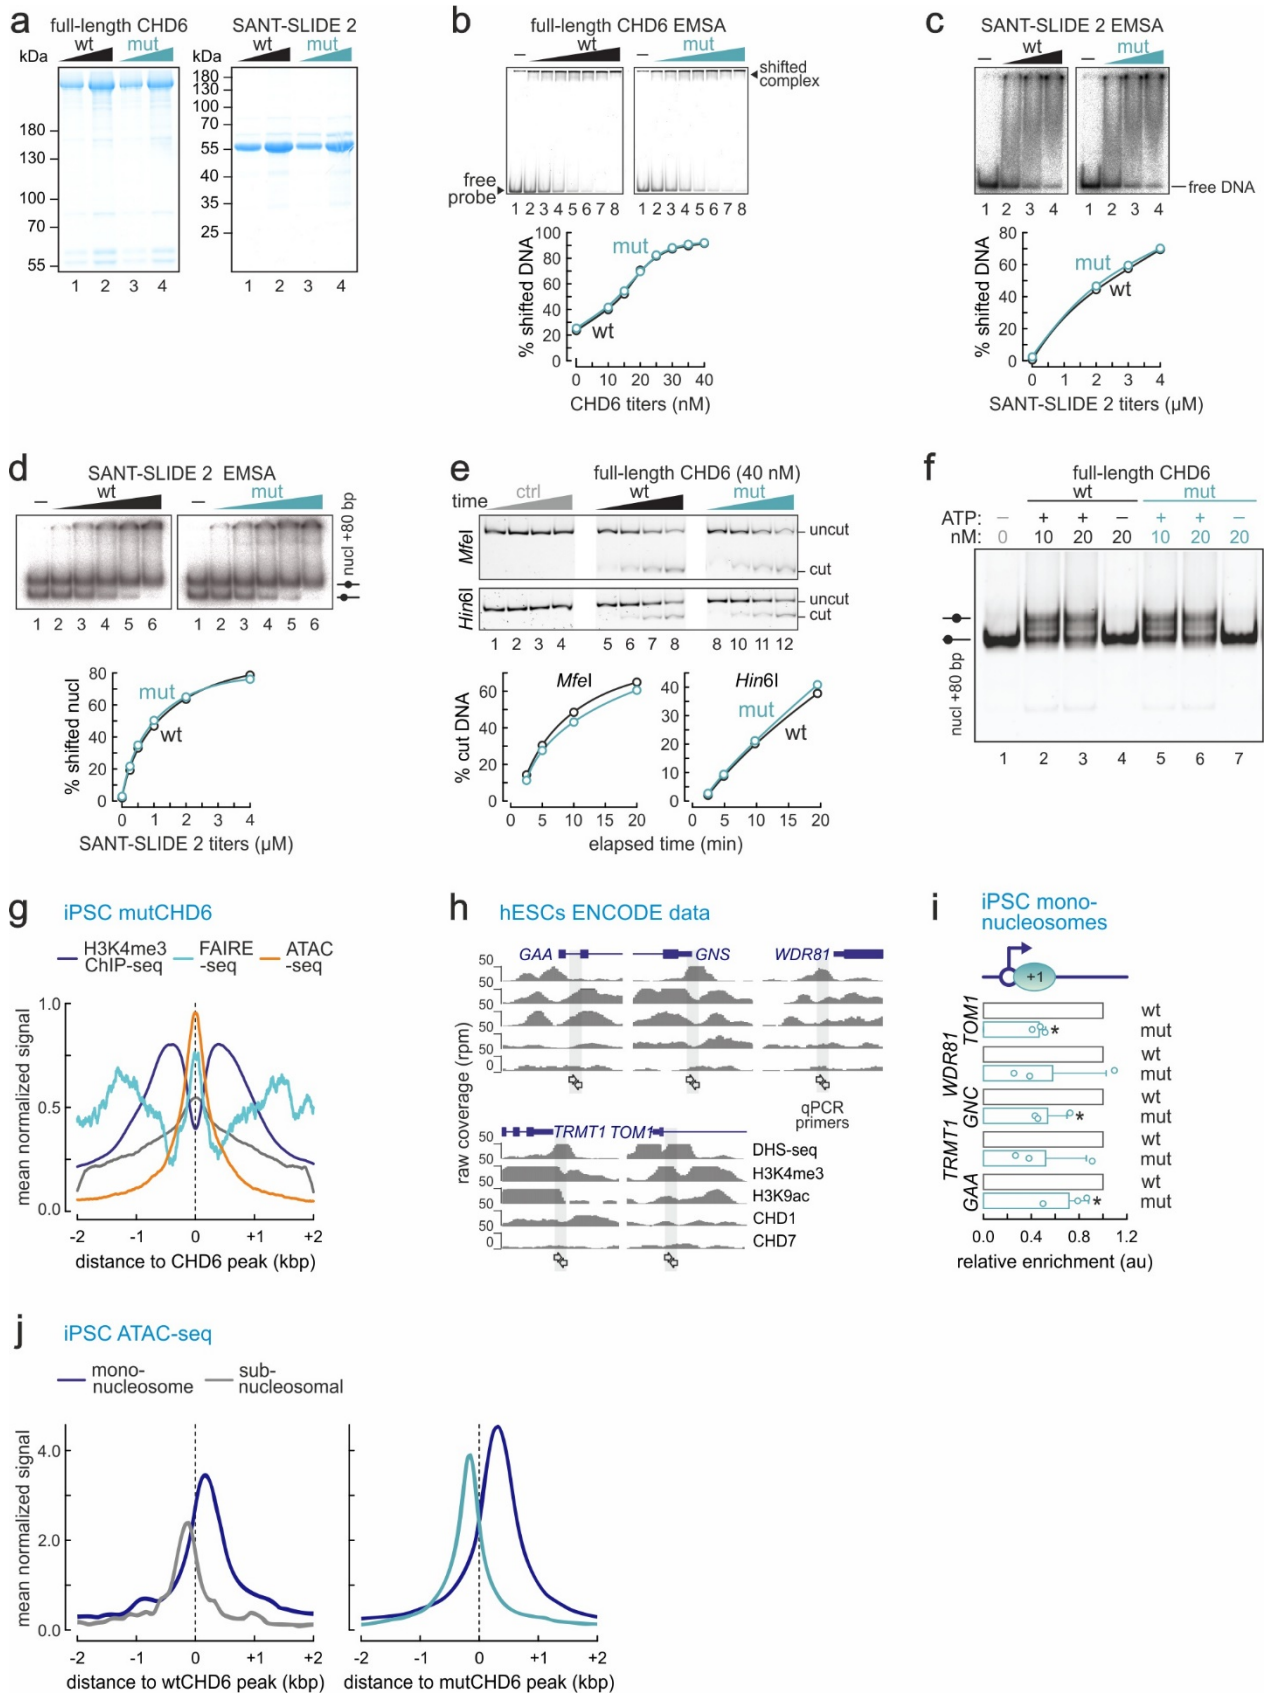

**Supplementary Fig. 5 Effects of the I1600M CHD6 mutation on DNA binding and nucleosome remodeling.**

**a**, Coomassie-stained SDS-PAGE of purified recombinant wild-type (wt) and I1600M (mut) full-length CHD6 and its second putative SANT-SLIDE domain. The migration profiles of molecular weight markers (in kDa) are indicated. **b**, DNA EMSAs performed with increasing titers of wild-type (wt) or mutant (mut) full-length CHD6. Quantification of the assay is shown below. **c**, As in panel (b), but for the wild-type (wt) or mutant (mut) SANT-SLIDE 2 domain. **d**, As in panel (b), but with increasing titers of the wild-type (wt) or mutant (mut) CHD6 SANT-SLIDE 2 domain on a nucleosomal template. **e**, Restriction enzyme accessibility assays (REA; *top*) on a mononucleosome in the presence of 40 nm of wild-type (wt) or mutant full-length CHD6 (mut); Changes in DNA accessibility were monitored near the entry/exit site of the nucleosome with *MfeI* (+28-bp) or around the dyad axis with *Hin6I*, as indicated on the left; quantification is shown below. **f**, Nucleosome sliding assays using an end-positioned nucleosome and increasing titers of wild-type (wt) or mutant full-length CHD6 (mut). **g**, Line plot showing mean distribution of H3K4me3 ChIP-seq (*blue*), FAIRE-seq (*green*), and ATAC-seq signal (*orange*) within the 4 kbp around mutCHD6 binding sites in iPSCs. **h**, Genome browser views showing hESC ENCODE DHS- and ChIP-seq data around five CHD6-bound gene promoters. Primer positions used in panel (i) are indicated by arrows. **i**, Bar plots showing mean relative MNase-qPCR signal enrichment ( $\pm$ SD; n=3 independent experiments) at CHD6-bound positions from panel (h) using mononucleosomes isolated from wild-type (wt) or monoallelic mutant (mut) iPSCs. \*: significantly different from wt;  $P < 0.01$ , two-tailed unpaired Student's t-test. **j**, Line plots showing mean ATAC-seq signal in the 4 kbp around wild-type (*left*) or mutant CHD6 ChIP-seq peaks (*right*). ATAC-seq reads corresponding to sub-nucleosomal DNA (<100 bp; *grey/green lines*) are plotted separately from those corresponding to nucleosomes (>150 bp; *blue lines*).

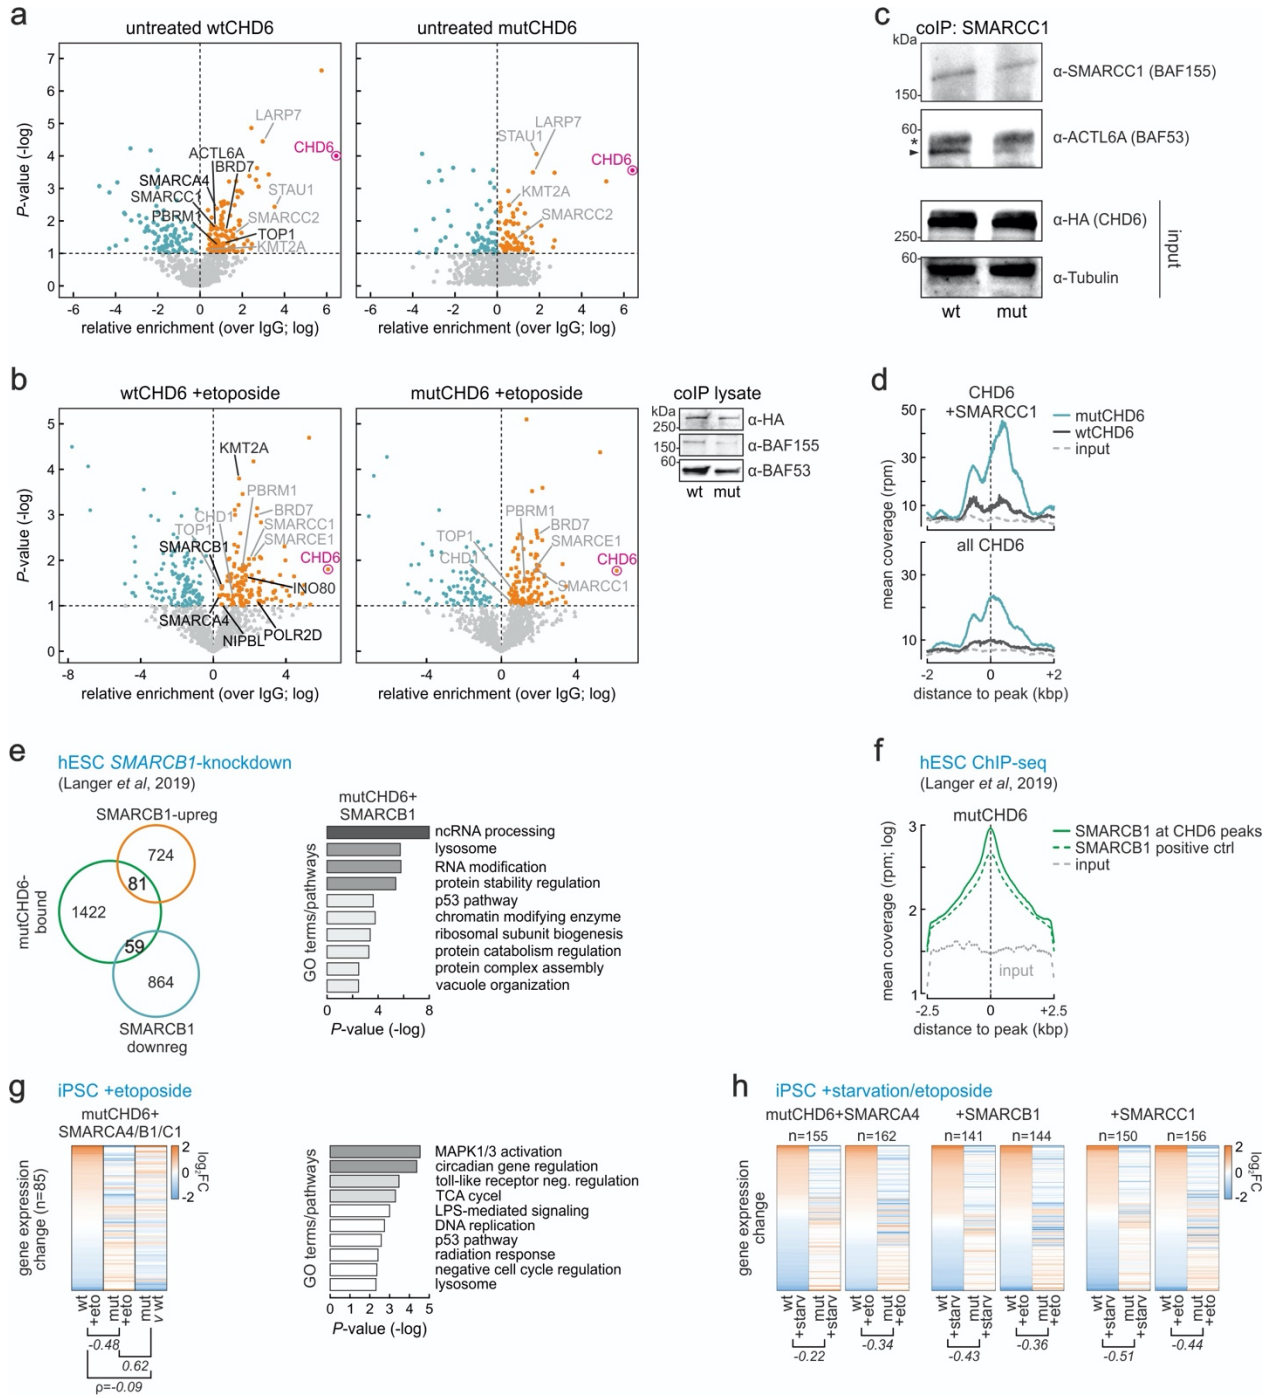

**Supplementary Fig. 6 Effects of the I1600M CHD6 mutation on co-factor recruitment and gene expression.**

**a**, Volcano plots of proteomics data following co-immunoprecipitation of proteins interacting with wild-type (*left*) or mutant CHD6 (*right*) obtained in iPSCs. Proteins significantly enriched compared to non-specific IgG controls are shown in orange, and chromatin remodeling subunits lost in the mutCHD6 interactome are highlighted (*black*) over shared interactors (*light grey*); enrichment of CHD6 in the data (*magenta*) provides a positive control. **b**, As in panel (a), but in iPSCs treated with etoposide for 2h. Western blots on the coIP input (*right*) show levels of wt/mutant CHD6 (anti-HA), SMARCC1 (BAF155) and ACTL6A (BAF53). **c**, Western blot of SMARCC1 co-immunoprecipitated by ACTL6A in iPSCs overexpressing wild-type (wt) or mutant CHD6 (mut); anti-HA and anti-tubulin blots provide loading controls. **d**, Line plots showing mean distribution of mutant (*light green*) and wild-type CHD6 ChIP-seq signal (*grey*) in the 4 kbp around shared CHD6/SMARCC1 (*top*) or all CHD6 peaks in iPSCs (*bottom*). Input signal (*dashed line*) provides a baseline. **e**, Venn diagrams (*left*) showing the overlap between CHD6-bound genes and genes differentially-regulated upon *SMARCB1(INI1)*-knockdown in hESCs. Bar plots (*right*) show significantly-enriched GO terms associated with CHD6-bound up-/downregulated genes. **f**, Line plot showing mean distribution of *SMARCB1* ChIP-seq signal (*green*) in the 5 kbp around mutCHD6 binding sites in iPSCs. Signal distribution around all *SMARCB1* peaks (*green dashed line*) provides a positive control, and input signal (*grey dashed line*) provides a baseline. **g**, Heatmaps showing changes in mRNA levels ( $\log_2$ ) of genes co-bound by mutCHD6 and *SMARCA4/-B1/-C1* in response to 1-h etoposide treatment. Pearson's correlation coefficients for each pairwise comparison are shown (*below*). Bar plots (*right*) show significantly-enriched GO terms associated with these genes. **h**, As in panel (g), but for changes in the expression of genes co-bound by mutant CHD6 and *SMARCA4* (*left*), *-B1* (*middle*) or *-C1* separately (*right*) in response to iPSC starvation or etoposide treatment.

**Supplementary Table 1.** Full list of antibodies and dilutions used.

| Antibody                              | Dilution used                                  | Provider                 | Cat. No.    | Link to manufacturer's info page                                                                                                                                                                                                |
|---------------------------------------|------------------------------------------------|--------------------------|-------------|---------------------------------------------------------------------------------------------------------------------------------------------------------------------------------------------------------------------------------|
| <b>CHD6</b>                           | WB (1:2000),<br>ChIP (5 µg/IP),<br>IF (1:1000) | Bethyl                   | A301-221A   | <a href="https://www.bethyl.com/product/A301-221A/CHD6+Antibody">https://www.bethyl.com/product/A301-221A/CHD6+Antibody</a>                                                                                                     |
| <b>TFEB</b>                           | ChIP (5 µg/IP),<br>IF (1:1000)                 | Bethyl                   | A303-673A   | <a href="https://www.bethyl.com/product/A303-673A/TFEB+Antibody">https://www.bethyl.com/product/A303-673A/TFEB+Antibody</a>                                                                                                     |
| <b>Phospho-ATM (Ser1981)</b>          | WB (1:2000),<br>IF (1:1000)                    | Cell Signaling           | 5883        | <a href="https://www.cellsignal.com/products/primary-antibodies/phospho-atm-ser1981-d6h9-rabbit-mab/5883">https://www.cellsignal.com/products/primary-antibodies/phospho-atm-ser1981-d6h9-rabbit-mab/5883</a>                   |
| <b>Phospho-ATR (Ser428)</b>           | WB (1:2000), IF<br>(1:1000)                    | Cell Signaling           | 2853        | <a href="https://www.cellsignal.com/products/primary-antibodies/phospho-atr-ser428-antibody/2853">https://www.cellsignal.com/products/primary-antibodies/phospho-atr-ser428-antibody/2853</a>                                   |
| <b>Phospho-BRCA1 (Ser1524)</b>        | WB (1:2000), IF<br>(1:1000)                    | Cell Signaling           | 9009        | <a href="https://www.cellsignal.com/products/primary-antibodies/phospho-brca1-ser1524-antibody/9009">https://www.cellsignal.com/products/primary-antibodies/phospho-brca1-ser1524-antibody/9009</a>                             |
| <b>Phospho-Chk1 (Ser345)</b>          | WB (1:2000),<br>IF (1:1000)                    | Cell Signaling           | 2348        | <a href="https://www.cellsignal.com/products/primary-antibodies/phospho-chk1-ser345-133d3-rabbit-mab/2348">https://www.cellsignal.com/products/primary-antibodies/phospho-chk1-ser345-133d3-rabbit-mab/2348</a>                 |
| <b>Phospho-Histone H2A.X (Ser139)</b> | WB (1:2000),<br>IF (1:1000)                    | Cell Signaling           | 9718        | <a href="https://www.cellsignal.com/products/primary-antibodies/phospho-histone-h2a-x-ser139-20e3-rabbit-mab/9718">https://www.cellsignal.com/products/primary-antibodies/phospho-histone-h2a-x-ser139-20e3-rabbit-mab/9718</a> |
| <b>Phospho-Chk2 (Thr68)</b>           | WB (1:2000),<br>IF (1:1000)                    | Cell Signaling           | 2197        | <a href="https://www.cellsignal.com/products/primary-antibodies/phospho-chk2-thr68-c13c1-rabbit-mab/2197">https://www.cellsignal.com/products/primary-antibodies/phospho-chk2-thr68-c13c1-rabbit-mab/2197</a>                   |
| <b>Phospho-p53 (Ser15)</b>            | WB (1:2000),<br>IF (1:1000)                    | Cell Signaling           | 9286        | <a href="https://www.cellsignal.com/products/primary-antibodies/phospho-p53-ser15-16g8-mouse-mab/9286">https://www.cellsignal.com/products/primary-antibodies/phospho-p53-ser15-16g8-mouse-mab/9286</a>                         |
| <b>αHP1</b>                           | IF (1:1000)                                    | Active Motif             | 39977       | <a href="https://www.activemotif.com/documents/tds/39977.pdf">https://www.activemotif.com/documents/tds/39977.pdf</a>                                                                                                           |
| <b>H3K27 me3</b>                      | IF (1:1000)                                    | Active Motif             | 39155       | <a href="https://www.activemotif.com/catalog/details/39155">https://www.activemotif.com/catalog/details/39155</a>                                                                                                               |
| <b>CHD6 (E-6)</b>                     | IF (1:1000)                                    | Santa Cruz               | sc-393445   | <a href="https://www.scbt.com/p/chd6-antibody-e-6">https://www.scbt.com/p/chd6-antibody-e-6</a>                                                                                                                                 |
| <b>Anti-HA-tag</b>                    | IF (1:1000),<br>IP (5 µg)                      | Thermo Fisher Scientific | 26183       | <a href="https://www.thermofisher.com/antibody/product/HA-Tag-Antibody-clone-2-2-2-14-Monoclonal/26183">https://www.thermofisher.com/antibody/product/HA-Tag-Antibody-clone-2-2-2-14-Monoclonal/26183</a>                       |
| <b>β-Tubulin</b>                      | WB (1:2000)                                    | Sigma-Aldrich            | T0198       | <a href="https://www.sigmaaldrich.com/catalog/product/sigma/t0198?lang=de&amp;region=DE">https://www.sigmaaldrich.com/catalog/product/sigma/t0198?lang=de&amp;region=DE</a>                                                     |
| <b>SMA</b>                            | IF (1:1000)                                    | Abcam                    | ab14106     | <a href="https://www.abcam.com/tag/Intransgelin-antibody-ab14106.html">https://www.abcam.com/tag/Intransgelin-antibody-ab14106.html</a>                                                                                         |
| <b>ATG12</b>                          | WB (1:2000)                                    | Cell Signaling           | 4180        | <a href="https://www.cellsignal.com/products/primary-antibodies/atg12-d88h11-rabbit-mab/4180">https://www.cellsignal.com/products/primary-antibodies/atg12-d88h11-rabbit-mab/4180</a>                                           |
| <b>ATG5</b>                           | WB (1:2000)                                    | Cell Signaling           | 12994       | <a href="https://www.cellsignal.com/products/primary-antibodies/atg5-d5f5u-rabbit-mab/12994">https://www.cellsignal.com/products/primary-antibodies/atg5-d5f5u-rabbit-mab/12994</a>                                             |
| <b>ATG7</b>                           | WB (1:2000)                                    | Cell Signaling           | 8558        | <a href="https://www.cellsignal.com/products/primary-antibodies/atg7-d12b11-rabbit-mab/8558">https://www.cellsignal.com/products/primary-antibodies/atg7-d12b11-rabbit-mab/8558</a>                                             |
| <b>PARP1</b>                          | WB (1:2000)                                    | Enzo                     | ALX-210-302 | <a href="https://www.enzolifesciences.com/ALX-210-302/parp-1-polyclonal-antibody/">https://www.enzolifesciences.com/ALX-210-302/parp-1-polyclonal-antibody/</a>                                                                 |

|                                              |             |                |         |                                                                                                                                                                                                                                                               |
|----------------------------------------------|-------------|----------------|---------|---------------------------------------------------------------------------------------------------------------------------------------------------------------------------------------------------------------------------------------------------------------|
| <b>LC3A/B</b>                                | WB (1:2000) | Cell Signaling | 12741   | <a href="https://www.cellsignal.com/products/primary-antibodies/lc3a-b-d3u4c-xp-rabbit-mab/12741">https://www.cellsignal.com/products/primary-antibodies/lc3a-b-d3u4c-xp-rabbit-mab/12741</a>                                                                 |
| <b>NKX2.5</b>                                | IF (1:500)  | R&D            | AF2444  | <a href="https://www.rndsystems.com/products/human-nkx25-antibody_af2444">https://www.rndsystems.com/products/human-nkx25-antibody_af2444</a>                                                                                                                 |
| <b>NANOG</b>                                 | IF (1:500)  | R&D            | AF1997  | <a href="https://www.rndsystems.com/products/human-nanog-antibody_af1997">https://www.rndsystems.com/products/human-nanog-antibody_af1997</a>                                                                                                                 |
| <b>OCT4</b>                                  | IF (1:500)  | Santa Cruz     | sc-5279 | <a href="https://www.scbt.com/de/p/oct-3-4-antibody-c-10">https://www.scbt.com/de/p/oct-3-4-antibody-c-10</a>                                                                                                                                                 |
| <b>PAX3</b>                                  | IF (1:500)  | DSHB           | PAX3-s  | <a href="https://dshb.biology.uiowa.edu/PCRP-PAX3-1B3">https://dshb.biology.uiowa.edu/PCRP-PAX3-1B3</a>                                                                                                                                                       |
| <b>CHD7</b>                                  | IF (1:500)  | Abcam          | ab31824 | <a href="https://www.labome.com/product/Abcam/ab31824.html">https://www.labome.com/product/Abcam/ab31824.html</a>                                                                                                                                             |
| <b>FOXO3</b>                                 | IF (1:500)  | Abcam          | ab67758 | <a href="https://www.abcam.com/foxo3-antibody-ab67758.html">https://www.abcam.com/foxo3-antibody-ab67758.html</a>                                                                                                                                             |
| <b>Phospho-S6 (Ser240/244)</b>               | IF (1:500)  | Cell Signaling | 5364    | <a href="https://www.cellsignal.com/products/primary-antibodies/phospho-s6-ribosomal-protein-ser240-244-d68f8-xp-rabbit-mab/5364">https://www.cellsignal.com/products/primary-antibodies/phospho-s6-ribosomal-protein-ser240-244-d68f8-xp-rabbit-mab/5364</a> |
| <b>MF20</b>                                  | IF (1:500)  | DSHB           | MF20    | <a href="https://dshb.biology.uiowa.edu/MF-20">https://dshb.biology.uiowa.edu/MF-20</a>                                                                                                                                                                       |
| <b><math>\beta</math>-Tubulin III (TUJ1)</b> | IF (1:500)  | Abcam          | 18207   | <a href="https://www.abcam.com/beta-iii-tubulin-antibody-neuronal-marker-ab18207.html">https://www.abcam.com/beta-iii-tubulin-antibody-neuronal-marker-ab18207.html</a>                                                                                       |
| <b>p62 (SQSTM1)</b>                          | IF (1:1000) | Biolegend      | 814801  | <a href="https://www.biolegend.com/en-us/products/purified-anti-p62-sqstm1-antibody-11503">https://www.biolegend.com/en-us/products/purified-anti-p62-sqstm1-antibody-11503</a>                                                                               |
